# Supplementary material
Source: PubMed Central journal article supplement (PMC8354591)
Supplement: KRNB_A_1850628_SM2853.pdf [file KRNB_A_1850628_SM2853.pdf]

*Supplementary Information*

**Differential roles of YTHDF1 and YTHDF3 in embryonic stem cell-derived cardiomyocyte differentiation**

**Shen Wang<sup>1</sup>, Jun Zhang<sup>1</sup>, Xiang Wu<sup>1</sup>, Xianrong Lin<sup>1</sup>, Xiao-Min Liu<sup>1\*</sup> and Jun Zhou<sup>1,2\*</sup>**

<sup>1</sup> School of Life Science and Technology, China Pharmaceutical University, Nanjing, Jiangsu 210009, China.

<sup>2</sup> State Key Laboratory of Natural Medicines, China Pharmaceutical University, Nanjing, Jiangsu 210009, China.

\* Correspondence: [jz572@cpu.edu.cn](mailto:jz572@cpu.edu.cn), [liuxm642@cpu.edu.cn](mailto:liuxm642@cpu.edu.cn)

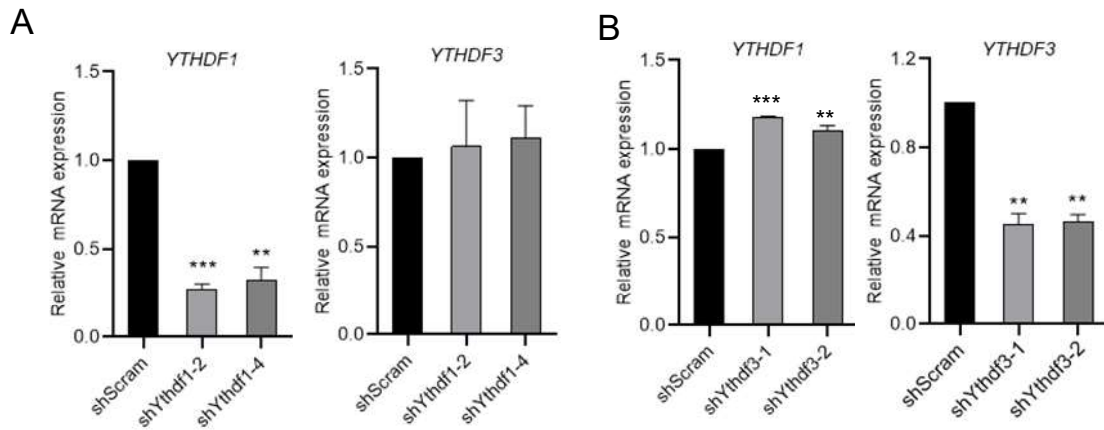

**Figure S1. Detection of *YTHDF* mRNA levels in *Ythdf*-knockdown cells.** (A) Detection of *YTHDF1* and *YTHDF3* mRNA levels in *Ythdf1*-knockdown ESCs by qRT-PCR. (B) Detection of *YTHDF1* and *YTHDF3* mRNA levels in *Ythdf3*- knockdown ESCs by qRT-PCR. Error bars, mean  $\pm$  s.e.m.; \*\* $P < 0.01$ , \*\*\* $P < 0.001$ , unpaired two tailed *t*-test;  $n = 4$  independent experiments.

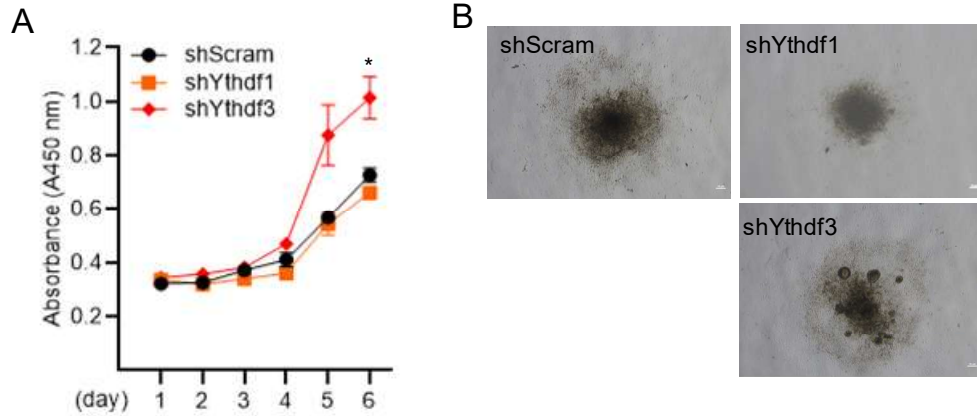

**Figure S2. Cell growth and embryonic bodies (EBs) formation of *Ythdf*-knockdown cells.**

(A) Measurement of cell growth rate in ESCs lacking either YTHDF1 or YTHDF3. Error bars, mean  $\pm$  s.e.m.; \* $P < 0.05$ , unpaired two tailed *t*-test;  $n = 3$  independent experiments. (B) Representative morphologic images of *Ythdf1*- and *Ythdf3*-knockdown EBs compared with shScram EBs at day 4.

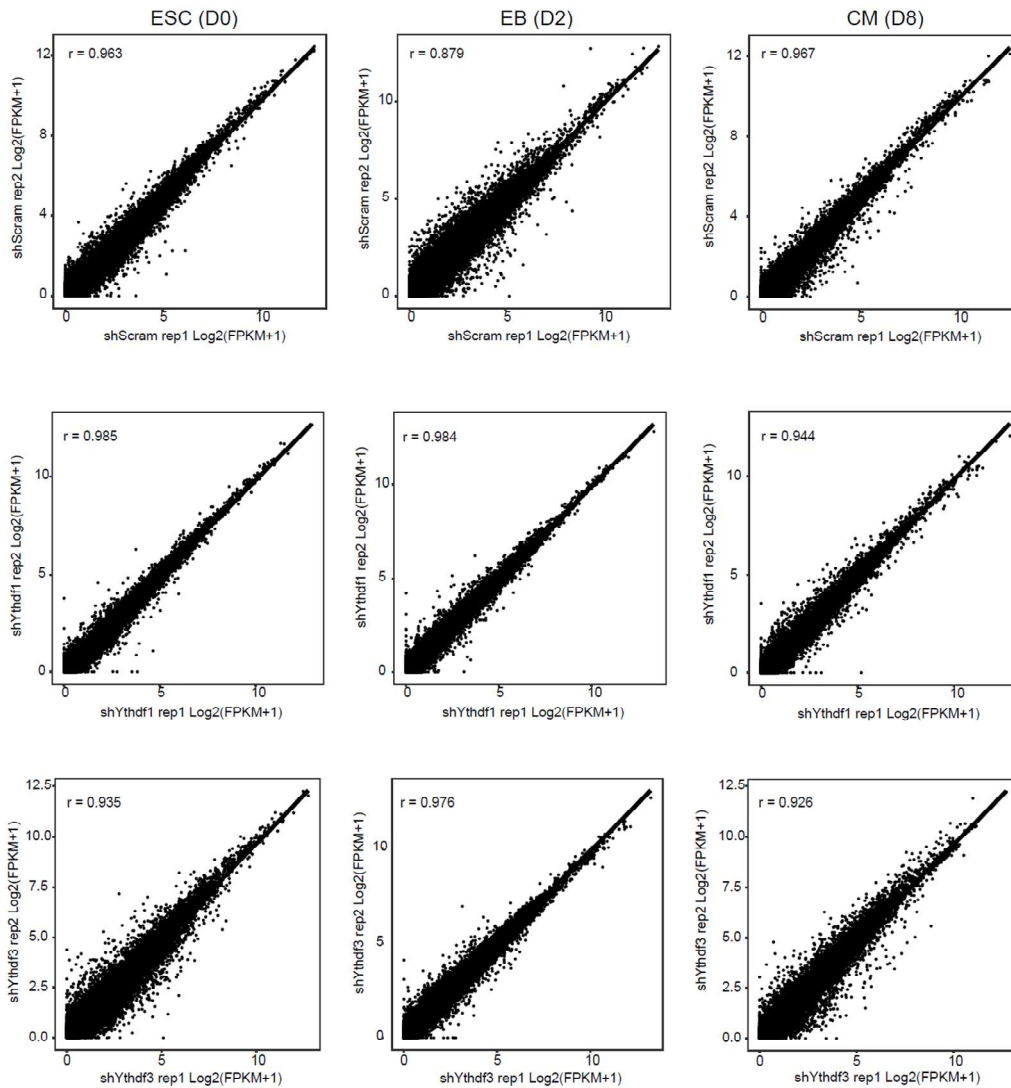

**Figure S3. Reproducibility of RNA-sequencing data.** Pearson's correlation of reads enrichment as  $\log_2(\text{FPKM}+1)$  between two biological replicates in control and *Ythdf*-KD ESC (day 0), EB (day 2) and CM (day 8).

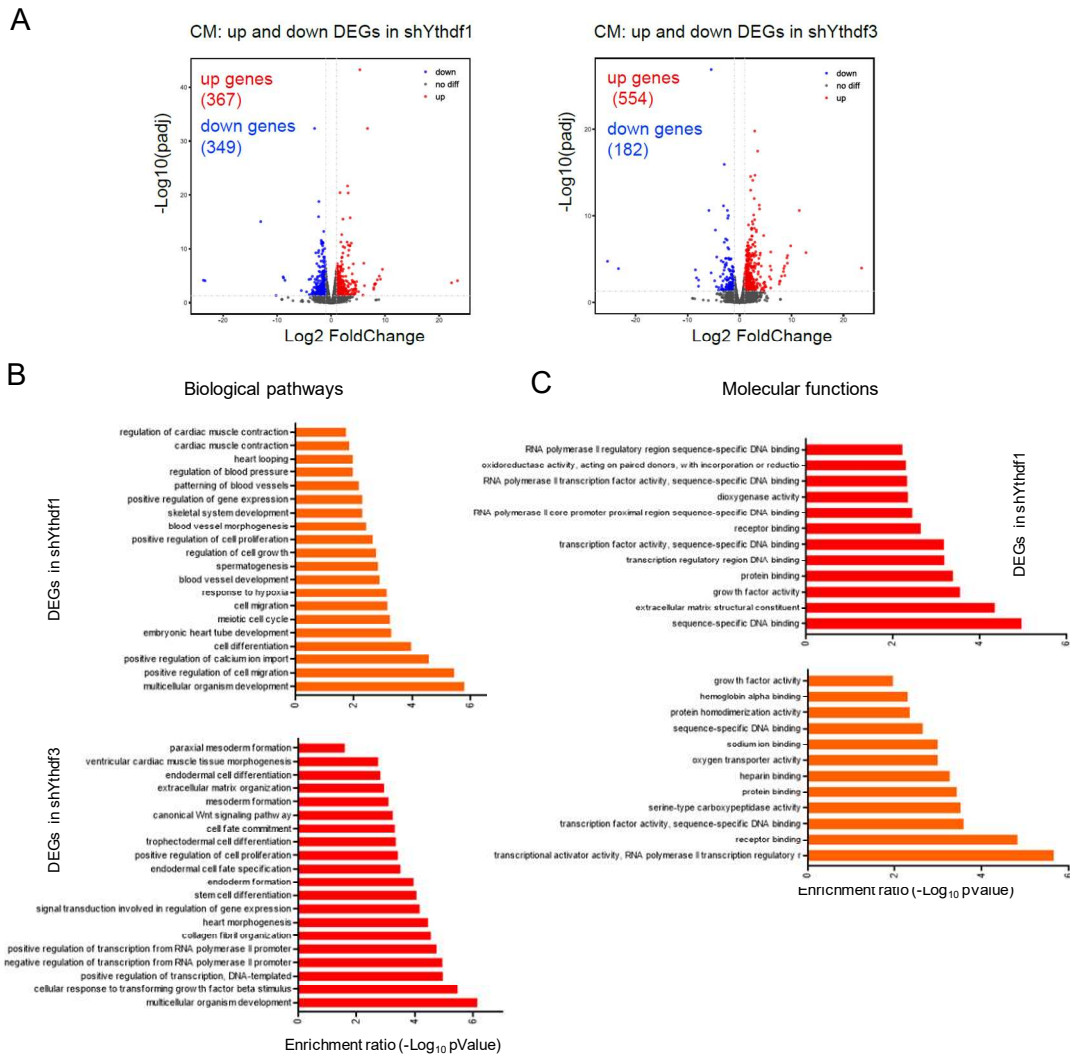

**Figure S4. GO analysis of significantly differentially expressed genes in *Ythdf*-KD CMs.**

(A) Volcano plot of differentially expressed genes between the control and *Ythdf*-KD CMs.

(B-C) GO analysis of significantly differentially expressed genes in *Ythdf*-KD CMs versus control CMs by RNA-seq. The *P*-value for the enrichment of biological pathways (B) and

molecular functions (C) GO-term is shown.

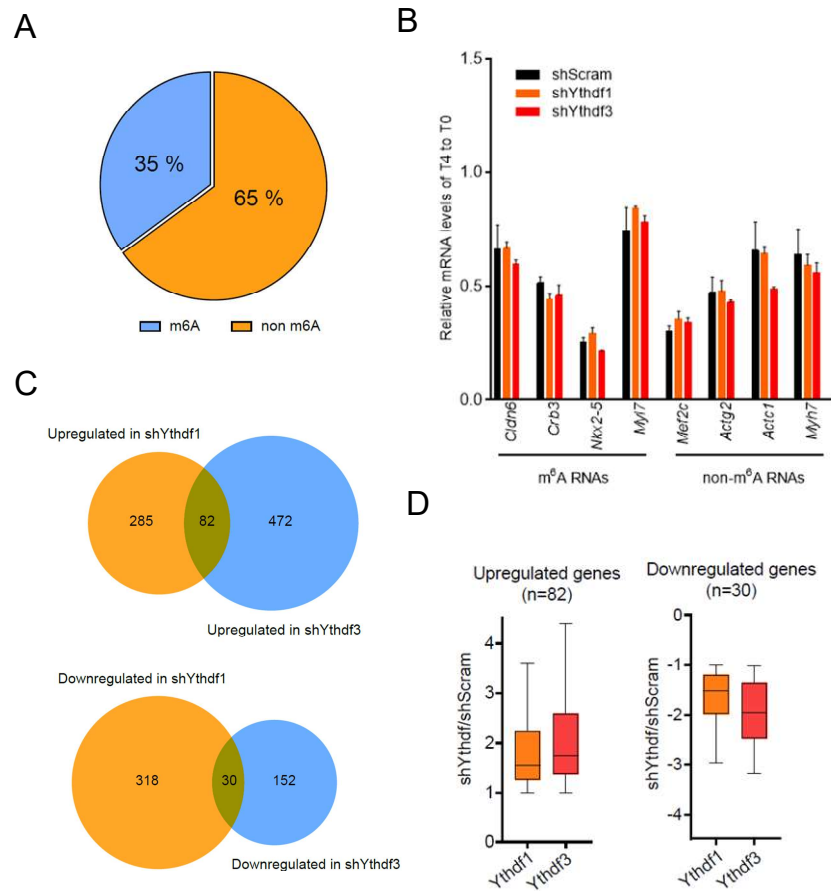

**Figure S5. Stability of m<sup>6</sup>A-bearing and non-m<sup>6</sup>A transcripts in *Ythdf*-depleted CMs.** (A) A total of 238 CM-specific genes showed simultaneously downregulated in *Ythdf1*-KD cells and upregulated in *Ythdf3*-KD cells, among which 155 transcripts are not m<sup>6</sup>A-modified, others contains m<sup>6</sup>A peaks in either ESC, EB or CM samples. (B) Measurement of mRNA levels of CM-specific transcripts bearing m<sup>6</sup>A or not in *Ythdf*-KD and control CMs after transcription inhibitor actinomycin D treatment for 4 h. (C) Overlapped the upregulated (*upper*) or downregulated (*down*) genes of *Ythdf1*-KD and *Ythdf3*-KD CMs (day 8) in comparison with control CMs. (D) Box plot showing the fold changes (shYthdf/shScram) of CM RNA-seq FPKM in overlapping upregulated (*left*) and downregulated (*right*) genes shown in A. CM-specific genes indicates the genes with  $\log_2(\text{CM FPKM}/\text{ESC FPKM}) > 1$ .

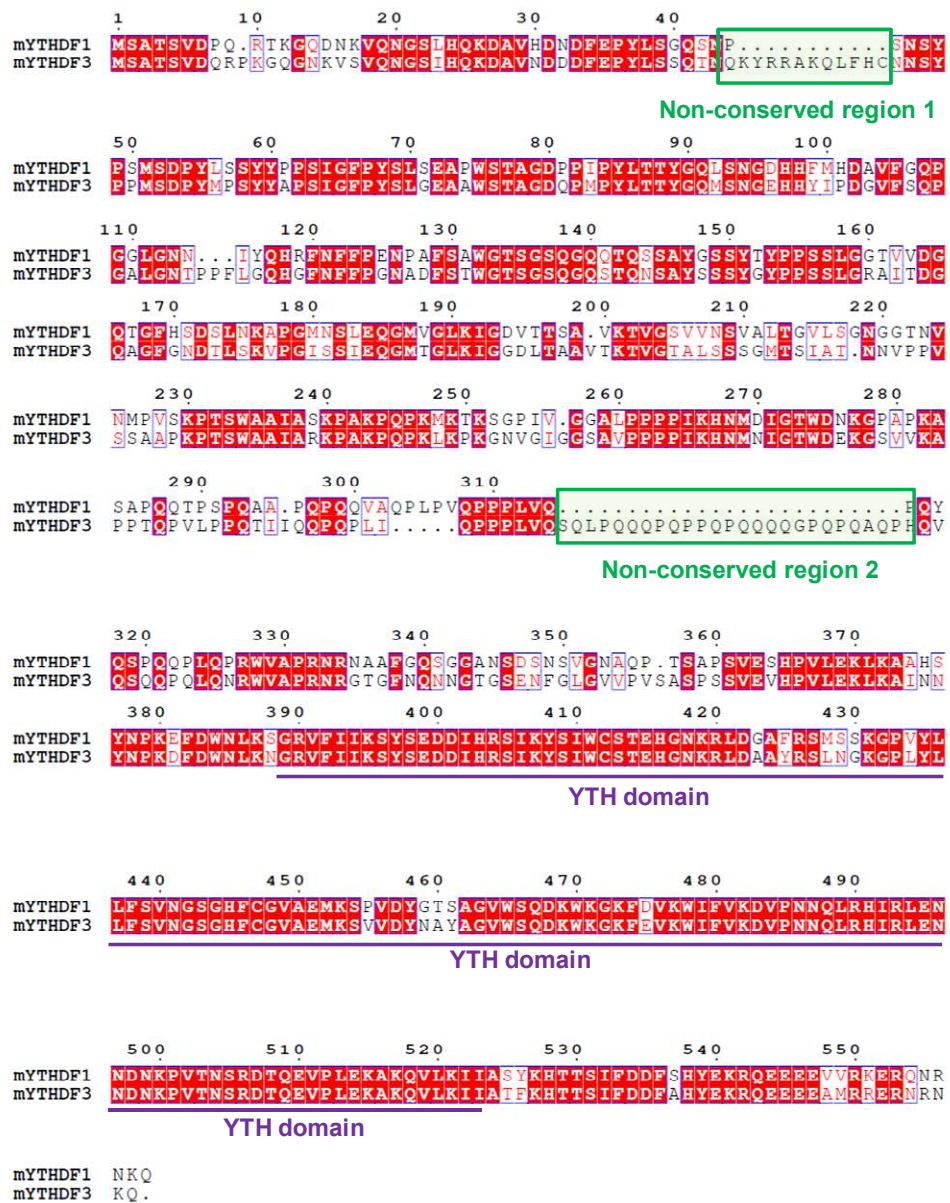

**Figure S6. Protein sequence alignment of mouse YTHDF1 and YTHDF3.** Conserved YTH domain and non-conserved regions are highlighted in green and purple, respectively.

**Table S1. Primers for qPCR used in this study.**

| <b>Gene name</b> | <b>Forward</b>                | <b>Reverse</b>               |
|------------------|-------------------------------|------------------------------|
| <i>Ythdf1</i>    | 5'-GCCACAGCTATAACCCTAAA-3'    | 5'-GTGGATGTCGTCCTCAGAATAG-3' |
| <i>Ythdf3</i>    | 5'-GGGAAAGGCCACTCTATTT-3'     | 5'-GAGACCAGACACCAGCATAAG-3'  |
| <i>Nanog</i>     | 5'-CAGCATCCATTGCAGCTATCC-3'   | 5'-CTGCCCCACATGGAAAGG-3'     |
| <i>Pou5f1</i>    | 5'-TCGGACCAGGCTCAGAGGTA-3'    | 5'-ATCCCTCCGCAGAACTCGTA-3'   |
| <i>Sox2</i>      | 5'-AAACCAAGACGCTCATGAAGAAG-3' | 5'-CGCTCGCCATGCTGTTC-3'      |
| <i>Dppa3</i>     | 5'-AGACTTGTTTCGGATTGAGCAG-3'  | 5'-TTTCGCATTCTCAGAGGGATC-3'  |
| <i>Klf2</i>      | 5'-CCTATCTTGCCGTCCTTTGC-3'    | 5'-CAGACCGTCCAATCCCATG-3'    |
| <i>Brachyury</i> | 5'-TCCCGAGACCCAGTTCATAG-3'    | 5'-TTCTTTGGCATCAAGGAAGG-3'   |
| <i>Nkx2-5</i>    | 5'-CTTTAGGAGAAGGGCGATGAC-3'   | 5'-AGGCTACGTCAATAAAGTGGG-3'  |
| <i>Gata4</i>     | 5'-CACTTAGGGATATGGGTGTTCC-3'  | 5'-GGCAGGTGGAGAATAAGGAAG-3'  |
| <i>Mef2c</i>     | 5'-TTCCACTCCCCATTGGA-3'       | 5'-TGCGCTTGACTGAAGGACTTT-3'  |
| <i>Actc1</i>     | 5'-GCTGTCTTCCCGTCCATC-3'      | 5'-ACTTCAGAGTCAGGATACCTCG-3' |
| <i>Actg2</i>     | 5'-CCTAAACCCCAAAGCAAACAG-3'   | 5'-CCCCGAATCCAGAACGATG-3'    |
| <i>Sox7</i>      | 5'-CTTCAGGGGACAAGAGTTCG-3'    | 5'-GGGTCTCTTCTGGGACAGTG-3'   |
| <i>Cldn6</i>     | 5'-TTTGCAGGCTCGGATATCAG-3'    | 5'-TTGACCCAGCCAAGCAG-3'      |
| <i>Crb3</i>      | 5'-AGACGCTGGAGTCAGGTCC-3'     | 5'-TTAGGCGACGAGTTGGTGAC-3'   |
| <i>Myh7</i>      | 5'-CCATCTCTGACAACGCCTATC-3'   | 5'-GGATGACCCTCTTAGTGTTGAC-3' |
| <i>Myl7</i>      | 5'-CTGAGTGCCTCCGCATGT-3'      | 5'-GCAAACAGTTGCTCTACCTCAG-3' |
| <i>Tnnt2</i>     | 5'-ACCCTCAGGCTCAGGTTCA-3'     | 5'-GTGTGCAGTCCCTGTTTCA-3'    |
| <i>β-actin</i>   | 5'-TTGCTGACAGGATGCAGAAG-3'    | 5'-ACTCCTGCTTGTGATCCACAT-3'  |
